# Supplementary material
Source: HighWire-hosted journal article supplement (https://www.jneurosci.org/highwire/filestream/599550/field_highwire_adjunct_files/0/Supplemental_Legend.pdf)
Supplement: Supplemental_Legend.pdf [file Supplemental_Legend.pdf]

**Supplementary Table 1.** The relation between the number of hair cells innervated per neuromast, hair-cell polarity, and larval age. The 135 data points were collected from 26 animals and represent 76 independent neuromasts. Because data were collected from some neuromasts at more than one time, the number of entries exceeds the number of independent neuromasts.
